# Supplementary figures and images for: A Pervasive History of Gene Flow in Madagascar’s True Lemurs (Genus Eulemur)
Source: MDPI journal article supplement (doi:10.3390/genes14061130), 2023-05-23

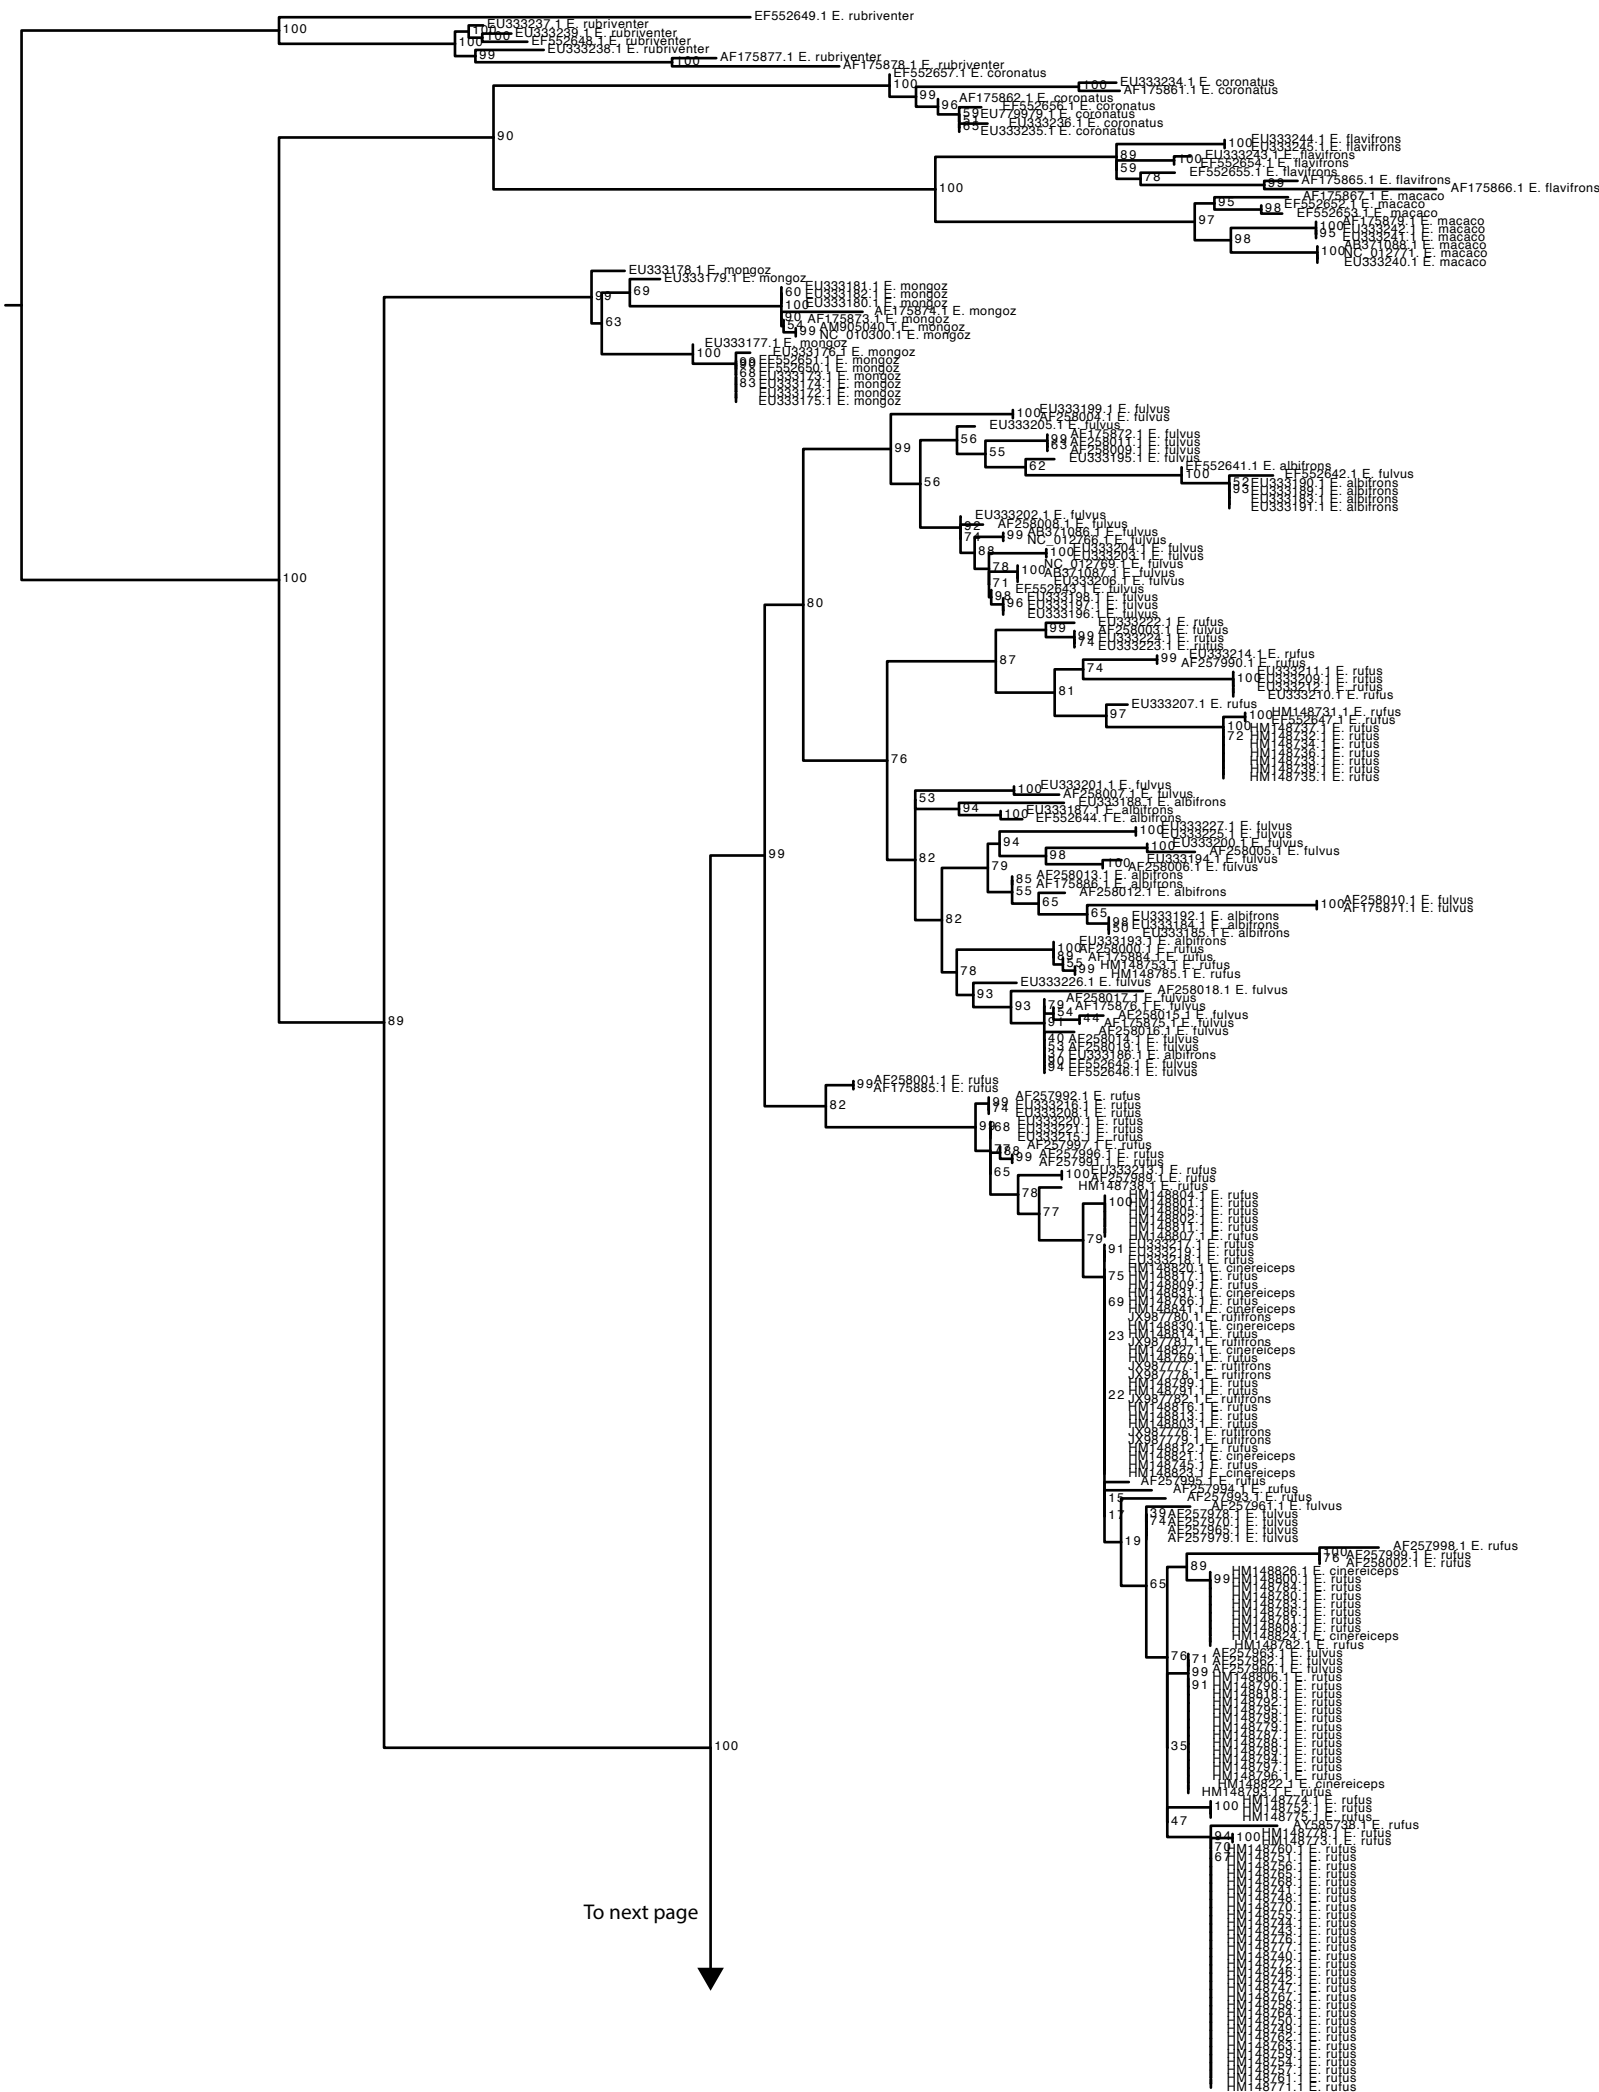

To next page

Supplement: s1 [file s1]
